# Supplementary material
Source: PubMed Central journal article supplement (PMC5821207)
Supplement: jciinsight-3-94142-s002.pdf [file jciinsight-3-94142-s002.pdf]

| <b>Supplemental Table 1:</b> |                     |              |                     |
|------------------------------|---------------------|--------------|---------------------|
| <b>Fluorophore</b>           | <b>T-cell Panel</b> | <b>Clone</b> | <b>Manufacturer</b> |
| APC                          | GP66+ tetramer      |              |                     |
| PE-Cy5                       | x                   |              |                     |
| AF700                        | CD44                | IM7          | eBioscience         |
| APC-Cy7                      | x                   |              |                     |
| PE                           | Tbet                | ebio 410     | eBioscience         |
| PE-Cy7                       | CXCR5               | 2g8          | eBioscience         |
| PE-CE594                     | b220                | RA4-682      | BD                  |
| PE-e610                      | x                   |              |                     |
| FITC                         | PD-1                | J43          | eBioscience         |
| P5.5                         |                     |              |                     |
| PE-e710                      |                     |              |                     |
| BV421                        | CXCR3               |              | 173 BD              |
| e450                         |                     |              |                     |
| BV510                        | CD4                 | RM 4-5       | BD                  |
| BV605                        | CCR7-bio            | 4B17         | BD                  |
| BV650                        |                     |              |                     |
| BV711                        | CD8                 | 53-6.7       | BD                  |
| BV786                        | CD62L               | MEL14        | BD                  |
|                              |                     |              |                     |
| BUV 737                      | x                   |              |                     |
| BUV 395                      | Thy1.2              | 53-2.1       | BD                  |

| Fluorophore | B cell Panel    | Clone    | Manufacturer |
|-------------|-----------------|----------|--------------|
| APC         | IgM             | II/41    | BD           |
| PE-Cy5      | DECOY           |          |              |
| AF700       | CD38            | 90       | eBioscience  |
| APC-Cy7     | none            |          |              |
| PE          | MSP tetramer    |          |              |
| PE-Cy7      | CD73            | Ty11.8   | eBioscience  |
| PE-CE594    | x               |          |              |
| PE-e610     | x               |          |              |
| FITC        | CD80            | 16-10A1  | Biolegend    |
| P5.5        | CD4             | RM 4-5   | BF           |
| PE-e710     |                 |          |              |
| BV421       | x               |          |              |
| e450        | GL7             | GL7      | BD           |
| BV510       | live/dead       |          |              |
| BV605       | CD138           | 281-2    | BD           |
| BV650       | IgD             | 11-26-2a | BD           |
| BV711       | CD19            | 1D3      | BD           |
| BV786       |                 |          |              |
|             |                 |          |              |
| BUV 737     | B220            | RA3-GB2  | BD           |
| BUV 395     | Thy 1.2         | 53-21    | BD           |
|             |                 |          |              |
|             | <b>Congenic</b> |          |              |
| BV650       | CD45.1          | A20      | BD           |
| FITC        | CD45.2          | 104      | Biolegend    |

| <b>Fluorophore</b> | <b>Parasitemia ant</b> | <b>Clone</b> | <b>Manufacturer</b> |
|--------------------|------------------------|--------------|---------------------|
| APC                | CD45                   | R17217       | BD                  |
| FITC               | Ter119                 | Ter119       | BD                  |
| PE                 | CD71                   | 30-F11       | eBioscience         |

| <b>Fluorophore</b> | <b>Global Panel</b> | <b>Clone</b> | <b>Manufacturer</b> |
|--------------------|---------------------|--------------|---------------------|
| APC                | Siglec H            | 551          | Biolegend           |
| PE-Cy5             | NONE                |              |                     |
| AF700              | CD4                 | GK1.5        | eBioscience         |
| APC-Cy7            | Ly6C                | HK1.4        | eBioscience         |
| PE                 | CD19                | 1D3          | BD                  |
| PE-Cy7             | Ly6G                | 1a8          | biolegend           |
| PE-CE594           | CD11b               | M1/70        | BD                  |
| PE-e610            | x                   |              |                     |
| FITC               | CD317               | eBio927      | eBioscience         |
| P5.5               |                     |              |                     |
| PE-e710            |                     |              |                     |
| BV421              |                     |              |                     |
| e450               | MHCII               | M5/114.15.2  | eBioscience         |
| BV510              | cd8                 | 53.617       |                     |
| BV605              | F4/80 bio           | BM8          | biolegend           |
| BV650              |                     |              |                     |
| BV711              | CD11c               | HL3          | BD                  |
| BV786              | CD62L               | MEL14        | BD                  |
|                    |                     |              |                     |
| BUV 737            | B220                | RA3-GB2      | BD                  |
| BUV 395            | Thy 1.2             | 53-21        | BD                  |
