# Supplementary material
Source: PubMed Central journal article supplement (PMC5821207)
Supplement: jciinsight-3-94142-s003.pdf [file jciinsight-3-94142-s003.pdf]

| Supplemental Table 2 |                  |                         |
|----------------------|------------------|-------------------------|
| Gene Target          | Primer Direction | Sequence                |
| IFN beta             | F                | CTCCACCACAGCCCTCTC      |
|                      | R                | CATCTTCTCCGTCATCTCCATAG |
| IFIT1                | F                | TGCTGAGATGGACTGTGAGG    |
|                      | R                | CTCCACTTTCAGAGCCTTCG    |
| IRF7                 | F                | CAGCGAGTGCTGTTTGCAGAC   |
|                      | R                | AAGTTCGTACACCTTATGCGG   |
| CXCL10               | F                | CCAAGTGCTGCCGTCATTTTC   |
|                      | R                | GGCTCGCAGGGATGATTTCAA   |
| HPRT                 | F                | TGGATACAGGCCAGACTTTGTT  |
|                      | R                | CAGATTCAACTTGCGCTCATC   |
